1 **Noninvasive Prenatal Diagnosis for Duchenne Muscular Dystrophy Based on the**  
2 **Direct Haplotype Phasing**

3 **Running title:** Noninvasive Prenatal Diagnosis of Duchenne Muscular Dystrophy

4 Min Chen<sup>1,2,3,4#</sup>, Chao Chen<sup>5#</sup>, Xiaoyan Huang<sup>6#</sup>, Jun Sun<sup>5</sup>, Lu Jiang<sup>5</sup>, Yingting Li<sup>1,2,3,4</sup>,  
5 Yaping Zhu<sup>5</sup>, Changgeng Tian<sup>6</sup>, Yufan Li<sup>1,2,3,4</sup>, Zhe Lu<sup>5</sup>, Yaoshen Wang<sup>5</sup>, Fanwei  
6 Zeng<sup>6</sup>, Yun Yang<sup>7</sup>, Zhiyu Peng<sup>6</sup>, Chenghong Yin<sup>8\*</sup>, Dunjin Chen<sup>1,2,3,4,9\*</sup>

7 **Author information**

8 <sup>1</sup> Department of Fetal Medicine and Prenatal Diagnosis, the Third Affiliated Hospital  
9 of Guangzhou Medical University, Guangzhou, 510150, China;

10 <sup>2</sup> Obstetrics & Gynecology Institute of Guangzhou, Guangzhou, 510150, China;

11 <sup>3</sup> The Medical Centre for Critical Pregnant Women in Guangzhou, Guangzhou,  
12 510150, China;

13 <sup>4</sup> Key Laboratory for Major Obstetric Diseases of Guangdong Province, Guangzhou,  
14 510150, China;

15 <sup>5</sup> Tianjin Medical Laboratory, BGI-Tianjin, BGI-Shenzhen, Tianjin 300308, China;

16 <sup>6</sup>BGI Genomics, BGI-Shenzhen, Shenzhen, 518083, China ;

17 <sup>7</sup>Wuhan BGI Clinical Laboratory Co., Ltd, BGI-Wuhan, BGI-Shenzhen, Wuhan  
18 430074, China;

19 <sup>8</sup>Beijing Obstetrics and Gynecology Hospital, Capital Medical University, Beijing  
20 100026, China.

21 <sup>9</sup>Key Laboratory for Reproduction and Genetics of Guangdong Higher Education  
22 Institutes

23 #The first three authors contributed equally to this work.

24

25 **\*Corresponding Authors:**

1 Dunjin Chen

2 Address: Department of Fetal Medicine and Prenatal Diagnosis, the Third Affiliated

3 Hospital of Guangzhou Medical University, Guangzhou, 510150, China

4 Email: chendunjin@hotmail.com

5 Chenghong Yin

6 Address: Beijing Obstetrics and Gynecology Hospital, Capital Medical University,

7 Beijing 100026, China

8 Email: modscn@126.com

9

10 **Conflict of interest:**

11 None of the authors have any conflicts of interest to declare.

12

1    **Abstract**

2    **Objective** We aimed to investigate the validity of noninvasive prenatal diagnosis  
3    (NIPD) based on direct haplotype phasing without the proband and its feasibility for  
4    clinical application in the case of Duchenne Muscular Dystrophy (DMD).

5    **Methods** Thirteen singleton-pregnancy families affected by DMD were recruited.  
6    Firstly, we resolved maternal haplotypes for each family by performing targeted  
7    linked-read sequencing of their high molecular weight DNA, respectively. Then, we  
8    identified SNPs of the *DMD* gene in all carrier mothers and inferred the *DMD* gene  
9    mutation status of all fetuses. Finally, the fetal genotypes were further validated by  
10    using chorionic villus sampling.

11   **Results** The method of directly resolving maternal haplotype through targeted  
12   linked-read sequencing was smoothly performed in all participated families. The  
13   predicted mutational status of 13 fetuses was correct, which had been confirmed by  
14   invasive prenatal diagnosis.

15   **Conclusion** Direct haplotyping of NIPD based on linked-read sequencing for DMD is  
16   accurate.

17

18

19

## 1 **Introduction**

2 Duchenne Muscular Dystrophy (DMD) is an X-linked recessive disease characterized  
3 by progressive muscle degeneration and weakness<sup>1</sup>, which usually occurs in early  
4 childhood, affecting approximately 1 in 3500 male births worldwide<sup>2</sup>. It is reported  
5 that DMD is caused by the mutations of the *DMD* gene on the X chromosome<sup>3</sup>.  
6 Current gold standards for prenatal diagnostic testing include amniocentesis or  
7 chorionic villus sampling (CVS)<sup>4</sup>. With the discovery of cell-free fetal DNA in  
8 maternal plasma<sup>5</sup> and the development of genetic testing methods, noninvasive  
9 prenatal diagnosis (NIPD) is increasingly used in clinical practice. The feasibility and  
10 accuracy of detecting fetal DNA using maternal plasma DNA have been confirmed by  
11 a large number of studies. NIPD was initially used to detect fetal aneuploidy, but its  
12 application in single gene disorders has also been explored<sup>6</sup>.

13 The detection of DMD by NIPD has been researched previously, but most studies are  
14 based on trios' strategy with a proband<sup>7,8</sup>. This approach can address some of the  
15 needs of prenatal diagnosis, but for female carriers, it is unable to detect the  
16 genotypes of their first child because there is no proband could provide assistance for  
17 resolving haplotypes. Many efforts have been made to overcome this problem, with  
18 microfluidics-based linked-read sequencing technology being used prominently<sup>9</sup>. This  
19 is a direct haplotyping phasing approach and has been reported to predict fetal  
20 genotypes without a proband in a family accurately. In the study published by Hui et  
21 al.<sup>10</sup>, the mutation inheritance status of the fetus was successfully deduced by  
22 integrating the linked-read sequencing technology of 10X Genomics, next-generation  
23 targeted sequencing and relative haplotype dosage (RHDO) analysis<sup>11</sup>. To confirm the  
24 accuracy of the direct haplotype-based NIPD and its feasibility for clinical application  
25 in the case of DMD, we recruited 13 families affected by DMD for research.

26

## 1 **Methods**

### 2 *Sample collection*

3 We recruited 13 high-risk families without a proband at the Third Affiliated Hospital  
4 of Guangzhou Medical University and obtained informed consent. All procedures  
5 were performed following the tenets of the Declaration of Helsinki and were  
6 approved by the Ethics Committee of the hospital. For each family, we collected 10ml  
7 maternal blood samples and 5mg CV between 11-25 weeks.

### 8 *Maternal DNA linked-read sequencing*

9 In this study, we designed a 657.29Kb SeqCap kit (Roche, Basel, Switzerland) for the  
10 *DMD* gene detection, which contains the coding region (13.91Kb) and the flanking  
11 region (1M) of the *DMD* gene, and the gender determination locus on the Y  
12 chromosome. The peripheral blood samples of the 13 carrier mothers were collected  
13 to obtain the genomic DNA (gDNA). Then, we isolated maternal high-molecular  
14 weight gDNA (> 40kb) to get barcoded DNA fragments by processing with 10X  
15 Genomics Chromium™ library (Pleasanton, CA) protocol. Finally, we performed  
16 targeted linked-read sequencing by using PE101 bp on Illumina Hiseq2500  
17 sequencing system (San Diego, CA).

### 18 *Plasma DNA sequencing library preparation*

19 We used the QIAamp Circulating Nucleic Acid kit to extract cell-free DNA from  
20 maternal plasma. Then, we prepared the library according to the protocol and  
21 performed sequencing on the Illumina platform (Hiseq 2500).

### 22 *Sequence alignment and SNP calling*

23 We aligned the barcoded reads of maternal to the reference genome (GRCh37/hg19)  
24 by performing 10X Lariat™ and called variants by using the GATK method in Long  
25 Ranger. The paired-end sequencing reads of maternal plasma DNA were mapped to  
26 the reference genome (GRCh37/hg19) using SOAP2 and the variants were  
27 determined using GATK software.

1 ***Haplotype phasing***

2 We resolved the maternal haplotypes from linked-read sequencing data of gDNA.  
3 Sequenced reads that shared the same barcode with the one carrying mutant allele  
4 were linked (mutant-linked barcode reads) and phased to the same haplotype.  
5 Wild-type linked barcode reads were phased to the opposite haplotype. Heterozygous  
6 SNPs associated with same haplotypes were used for subsequent fetal genotypic  
7 prediction and recombinant detection.

8 ***Direct haplotype-based NIPD of the fetus***

9 Because DMD is X chromosome inheritance, we focused on the SNPs of the X  
10 chromosome in the following analysis process. We constructed the Hidden Markov  
11 Model (HMM) by using maternal heterozygous SNPs on chromosome X and maternal  
12 plasma sequencing data to infer fetal haplotype. For each site, the HMM emission  
13 probabilities were the probabilities of genetically pathogenic and non-pathogenic  
14 alleles in the fetus, which were calculated by analyzing the number of reads in  
15 maternal plasma. The HMM transition probabilities were the recombination rates  
16 between SNPs, which were obtained from the SNPs genetic map (from NCBI). When  
17 analyzing the HMM model, we used the Viterbi algorithm to deduce the inherited  
18 haplotype and recombination breakpoints in the fetus.

19 ***Validation of NIPD for DMD***

20 To further verify the accuracy of NIPD, we obtained the fetal DNA by chorionic villus  
21 sampling and performed targeted sequencing using the same probe.

22

## 1 **Results**

2 Thirteen families at risk for a fetus with DMD were recruited. The clinical  
3 information and the mutational status of the studied cases are listed in Table 1.

4 The results of the targeted linked-read sequencing of all the samples were listed in  
5 Table 2. The mean depth of 13 maternal gDNA samples is 561X (rang: 329X-697X)  
6 and the average length of N50 phase-block is 741.61kb (range from 341.37kb to  
7 963.80kb). Through the bioinformatics analysis, there were more than 98% reads  
8 would map to the reference genome (GRCH37/hg19).

9 Reads that shared the same barcode and had the mutant allele at heterozygous SNP  
10 positions were considered to be the mutant-linked reads, designated as Hap0, while  
11 reads with the wild-type allele at same SNP positions were termed as Hap1. We  
12 directly resolved the 2 haplotypes of all 13 maternal gDNA by linking the haplotype  
13 blocks assembled by the barcoded reads.

14 The plasma DNA samples from 13 carrier mothers were target sequenced in the DMD  
15 region. The fraction of cffDNA ranged from 7.45% to 15.39% (Table 3). We used  
16 informative SNPs (average 701, Table 3) to construct the fetal haplotypes and  
17 performed HMM to infer the genotype of fetal *DMD*. The results of NIPD showed  
18 that four fetuses had inherited the Hap0 maternal haplotype, including two female  
19 carriers (F01 and F08) and two affected male fetuses (F02 and F07), and that seven  
20 fetuses had inherited the Hap1 maternal haplotype, including six normal female  
21 fetuses (F03, F04, F06, F09, F10, F11 and F12) and two normal male fetuses (F05 and  
22 F13) (Table 3 and Figure 1).

23 To further evaluate the performance of the direct haplotype-based NIPD, we  
24 performed targeted capture sequencing in CV samples, and all families had the same  
25 results as NIPD (Table 3).

26

## 1 **Discussion**

2 Traditional prenatal diagnostic methods, including chorionic villus sampling,  
3 amniocentesis, and umbilical cord puncture can be invasive and may put both the  
4 fetus and the pregnant woman at risk. The NIPD method is simpler and safer than  
5 invasive diagnosis because it only requires blood testing. Since the introduction of  
6 NIPD to clinical practice in 2011<sup>12</sup>, it has been widely implemented and is currently  
7 offered in over 60 countries<sup>13</sup>. NIPD was initially used to test for Down's Syndrome  
8 and other forms of fetal aneuploidy by using maternal plasma cell-free fetal DNA<sup>14</sup>.  
9 Now, it is also used for testing for monogenic diseases<sup>6</sup>. However, the limitations of  
10 NIPD applications in determining monogenic disorder are becoming more prominent  
11 as it requires genomic data from parents and the proband to resolve the parental  
12 haplotypes.

13 To the best of our knowledge, two methods have recently been proposed to overcome  
14 this disadvantage. Hui et al. have successfully applied linked-read sequencing  
15 technology in combination with relative haplotype dosage analysis to noninvasive  
16 prenatal testing of families without proband<sup>10</sup>. Vermeulen et al. combined the targeted  
17 locus amplification (TLA)-based haplotype phasing of the two parents with targeted  
18 sequencing of cell-free DNA for noninvasive prenatal testing of families without a  
19 first affected child<sup>15</sup>. These two-direct haplotype-based NIPD methods could  
20 accurately deduce the fetal mutation status without relying on the availability of DNA  
21 from the proband. In comparison, targeted haplotyping is less expensive, and  
22 linked-read sequencing has an advantage in recombination events analysis. The  
23 application of the two approaches in the case of DMD requires further exploration.

24 In this study, we first directly resolved the maternal haplotypes by performing  
25 linked-read sequencing, and then successfully predicted the genotype of fetal *DMD*  
26 by using the NIPD method in all 13 families. Gender identification is essential for the  
27 NIPD of X-linked recessive genetic diseases. We determine the sex of the fetus based  
28 on the average depth and the coverage of the target region in chromosome Y in the



1 plasma samples, as described in our previous work<sup>16</sup>.

2 Due to the limited researches in this area to date, more studies are needed to prove its  
3 clinical feasibility. Our study demonstrated that the direct haplotype-based method  
4 could provide accurate fetal genotype information on DMD without the proband,  
5 meaning that it could be an additional option for the NIPD of DMD.

## 6 **Conclusion**

7 The direct haplotype-based approach for DMD has potential for introduction for  
8 clinical service. To the best of our knowledge, this is the largest cohort without the  
9 probands for NIPD of DMD. Further studies should aim to refine the methodology,  
10 reduce the cost, and adopt this approach for a larger population with a wide range of  
11 genetic disorders.

12

## 13 **Acknowledgments :**

14 We thank all participants in this study for their collaborations.

15 The work was supported by the National Key Research and Development Program of  
16 China (2018YFC1004104) ,the National Natural Science Foundation of China (NSFC)  
17 (No. 81671470), , Guangzhou Science and Technology Program (No. 2014 Y2-00551,  
18 No. 201504282321393, No. 201604020078, No.201604020091), Guangdong Science  
19 and Technology Program (No. 2013B022000005, No. 2016A030313610).

20

## 1   **References**

- 2   1.    Campbell KP. Three muscular dystrophies: loss of cytoskeleton-extracellular matrix linkage.  
3       *Cell*. 1995;80(5):675-679.
- 4   2.    Romitti P, Puzhankara S, Mathews K, et al. Prevalence of Duchenne/Becker muscular  
5       dystrophy among males aged 5-24 years-four states, 2007. *Morbidity and Mortality Weekly*  
6       *Report*. 2009;58(40):1119-1122.
- 7   3.    Towbin JA, Hejtmancik JF, Brink P, et al. X-linked dilated cardiomyopathy. Molecular genetic  
8       evidence of linkage to the Duchenne muscular dystrophy (dystrophin) gene at the Xp21 locus.  
9       *Circulation*. 1993;87(6):1854-1865.
- 10 4.    Abbs S, Tuffery-Giraud S, Bakker E, Ferlini A, Sejersen T, Mueller CR. Best practice  
11       guidelines on molecular diagnostics in Duchenne/Becker muscular dystrophies.  
12       *Neuromuscular Disord*. 2010;20(6):422-427.
- 13 5.    Lo YD, Chan KA, Sun H, et al. Maternal plasma DNA sequencing reveals the genome-wide  
14       genetic and mutational profile of the fetus. *Sci Transl Med*. 2010;2(61):61ra91-61ra91.
- 15 6.    Lench N, Barrett A, Fielding S, et al. The clinical implementation of non-invasive prenatal  
16       diagnosis for single-gene disorders: challenges and progress made. *PRENATAL DIAG*.  
17       2013;33(6):555-562.
- 18 7.    Xu Y, Li X, Ge H-j, et al. Haplotype-based approach for noninvasive prenatal tests of  
19       Duchenne muscular dystrophy using cell-free fetal DNA in maternal plasma. *GENET MED*.  
20       2015;17(11):889.
- 21 8.    Parks M, Court S, Cleary S, et al. Non-invasive prenatal diagnosis of Duchenne and Becker  
22       muscular dystrophies by relative haplotype dosage. *PRENATAL DIAG*. 2016;36(4):312-320.
- 23 9.    Zheng GX, Lau BT, Schnall-Levin M, et al. Haplotyping germline and cancer genomes with  
24       high-throughput linked-read sequencing. *Nat Biotechnol*. 2016;34(3):303.
- 25 10.   Hui WW, Jiang P, Tong YK, et al. Universal haplotype-based noninvasive prenatal testing for  
26       single gene diseases. *CLIN CHEM*. 2017;63(2):513-524.
- 27 11.   Bustamante-Aragones A, Rodriguez de Alba M, Gonzalez-Gonzalez C, et al. Foetal sex  
28       determination in maternal blood from the seventh week of gestation and its role in diagnosing  
29       haemophilia in the foetuses of female carriers. *Haemophilia*. 2008;14(3):593-598.
- 30 12.   Lau TK, Chan MK, Salome Lo PS, et al. Clinical utility of noninvasive fetal trisomy (NIFTY)  
31       test—early experience. *The Journal of Maternal-Fetal & Neonatal Medicine*.  
32       2012;25(10):1856-1859.
- 33 13.   Allyse M, Minear MA, Berson E, et al. Non-invasive prenatal testing: a review of  
34       international implementation and challenges. *Int J Women's Health*. 2015;7:113.
- 35 14.   Lo YMD. Non-invasive prenatal diagnosis by massively parallel sequencing of maternal  
36       plasma DNA. *Open Biol*. 2012;2(6):120086.
- 37 15.   Vermeulen C, Geeven G, de Wit E, et al. Sensitive monogenic noninvasive prenatal diagnosis  
38       by targeted haplotyping. *Am J Hum Genet*. 2017;101(3):326-339.
- 39 16.   Ma D, Yuan Y, Luo C, et al. Noninvasive prenatal diagnosis of 21-Hydroxylase deficiency  
40       using target capture sequencing of maternal plasma DNA. *SCI REP-UK*. 2017;7(1):7427.

41

42

1 **Legends for figures and tables**

2 **Table 1. Clinical information and molecular diagnosis**

3 **Table 2. Statistics of linked-read sequencing data**

4 **Table 3. Noninvasive prenatal diagnosis of DMD families**

5 **Figure 1. Fetal haplotype determination.** The blue lines represent the maternal  
6 haplotype of fetal inheritance on the X chromosome. The lines above zero (Cyan line)  
7 indicate that the pathogenic allele is inherited (Hap0), while the lines below zero  
8 mean the normal allele is inherited (Hap1).

9

# Maternal inheritance

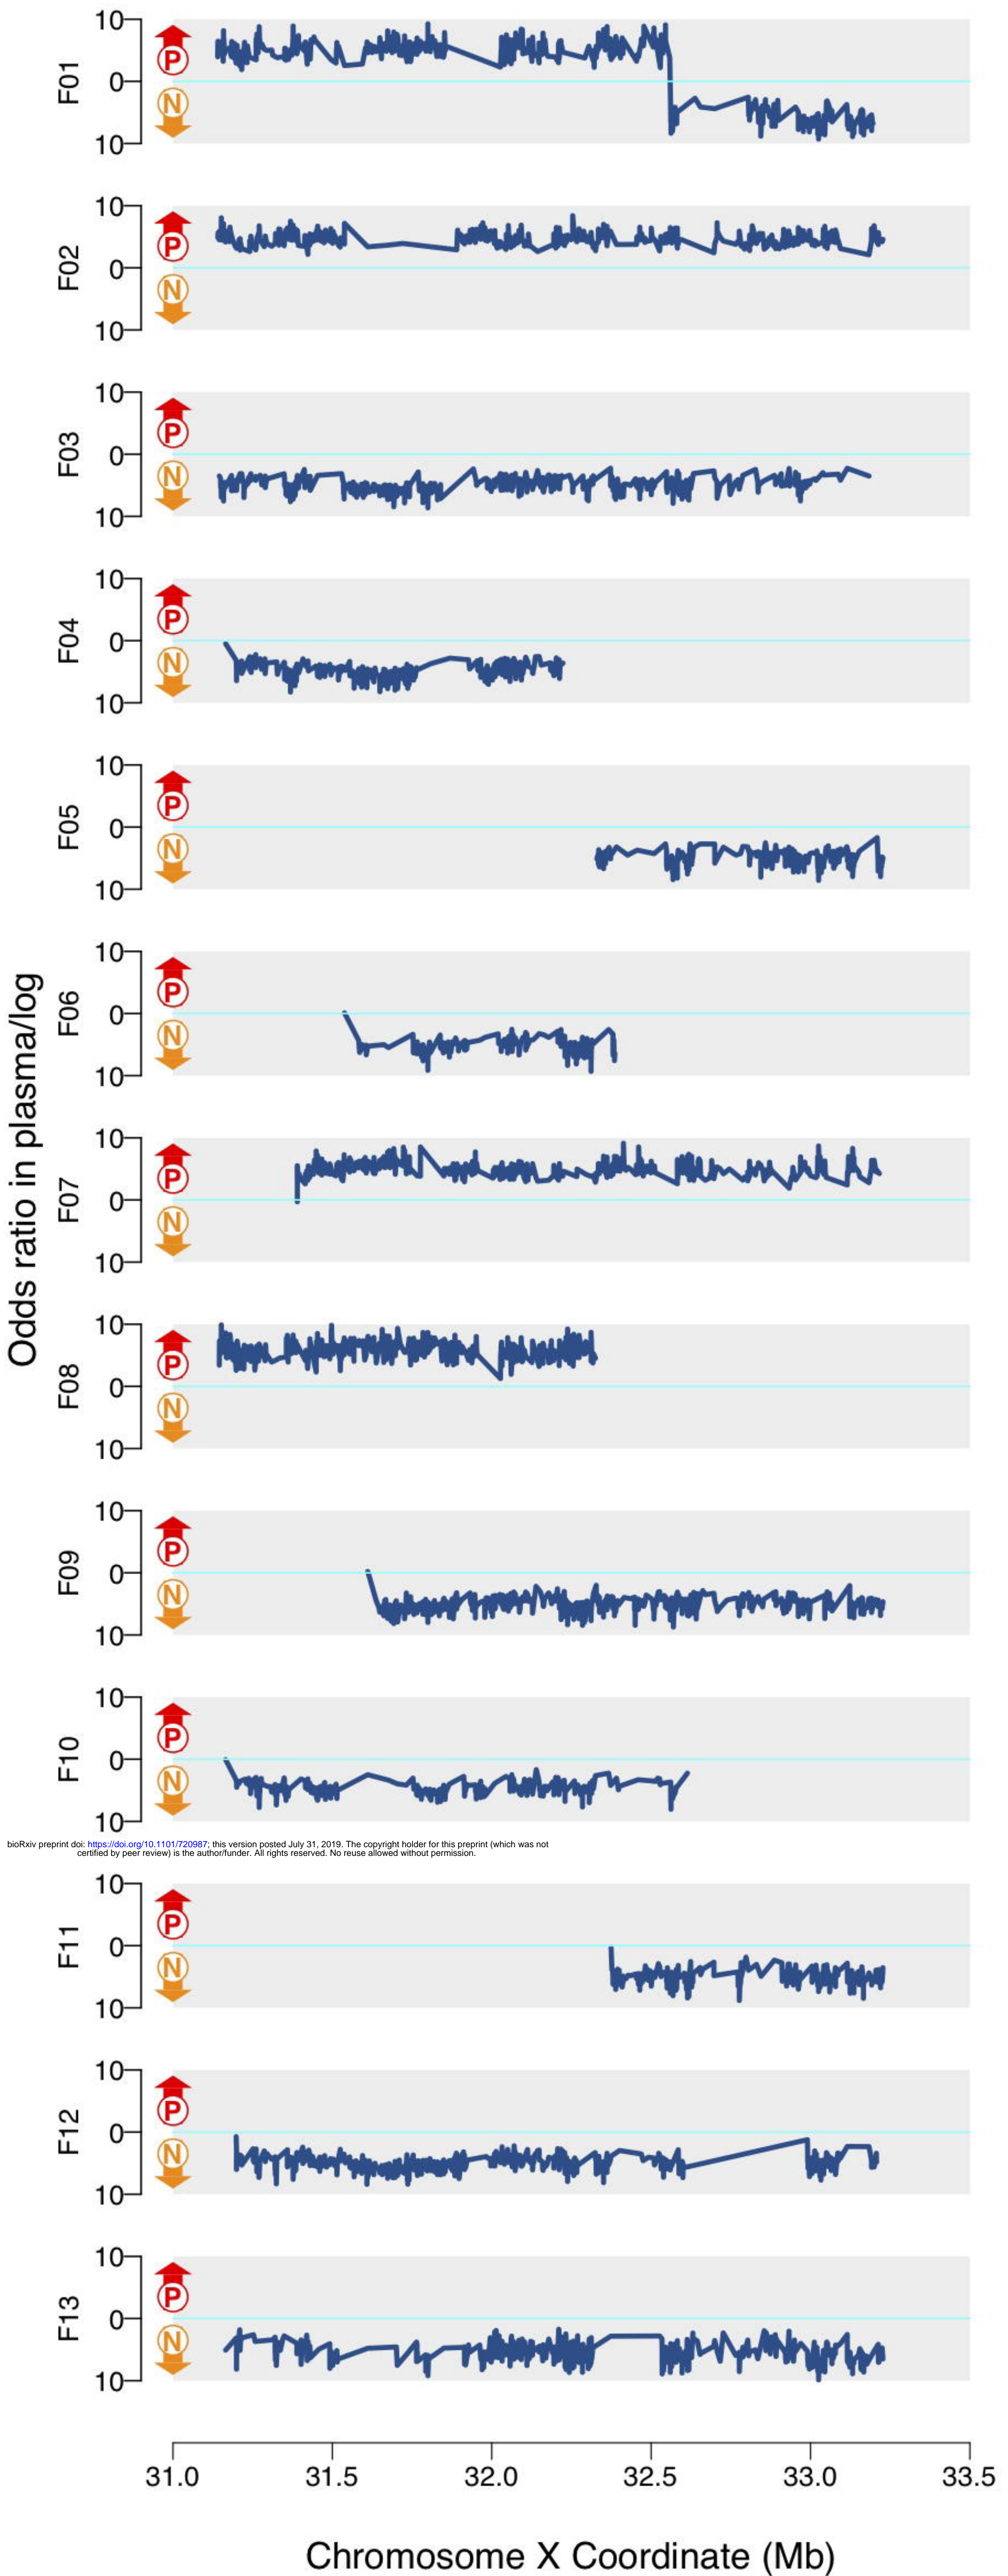

**Table 1. Clinical Information and Molecular Diagnosis**

| Family | Sample | GW     | DMD mutation                         |
|--------|--------|--------|--------------------------------------|
| F01    | mat    |        | Het.D.EX45-48                        |
|        | plasma | 19W+1D | -                                    |
| F02    | mat    |        | Het.D.EX49-52                        |
|        | plasma | 12W+1D | -                                    |
| F03    | mat    |        | Het.D.EX48-49                        |
|        | plasma | 11W+2D | -                                    |
| F04    | mat    |        | Het.D.EX46                           |
|        | plasma | 11W+5D |                                      |
| F05    | mat    |        | Het.c.1525TC[2]                      |
|        | plasma | 12W+6D |                                      |
| F06    | mat    |        | Het.D.EX50                           |
|        | plasma | 12W+1D |                                      |
| F07    | mat    |        | Het.D.EX45                           |
|        | plasma | 17W    |                                      |
| F08    | mat    |        | Het.D.EX45                           |
|        | plasma | 12W+4D |                                      |
| F09    | mat    |        | Het.c.237_256delGGCACTGCGGGTTTTGCAGA |
|        | plasma | 17W+3D |                                      |
| F10    | mat    |        | Het.c.10141C>T                       |
|        | plasma | 11W+3D |                                      |
| F11    | mat    |        | Het.D.EX42-43                        |
|        | plasma | 13W+3D |                                      |
| F12    | mat    |        | Het.D.EX3-13                         |
|        | plasma | 12W+4D |                                      |
| F13    | mat    |        | Het.c.1408A > T                      |
|        | plasma | 25W+4D |                                      |

Notes: Abbreviations: mat, maternal; Het. D.EX, Heterozygous deletion Exon; GW, Gestational Weeks.

**Table 2. Statistics of 10X Linked-read Sequencing Data**

| <b>Family</b> | <b>Gems detected</b> | <b>SNPs phased</b> | <b>Longest phase block</b> | <b>N50 phase block</b> | <b>Mean depth of target region</b> | <b>Mapped reads</b> |
|---------------|----------------------|--------------------|----------------------------|------------------------|------------------------------------|---------------------|
| F01           | 377998               | 97.95%             | 2993951                    | 798365.00              | 329                                | 98.95%              |
| F02           | 482807               | 98.20%             | 3110821                    | 963803.00              | 531                                | 98.94%              |
| F03           | 488937               | 98.05%             | 2474849                    | 963803.00              | 537                                | 99.09%              |
| F04           | 572612               | 98.35%             | 1366582                    | 479287.00              | 697                                | 99.48%              |
| F05           | 549633               | 98.26%             | 1983343                    | 493754.00              | 644                                | 99.58%              |
| F06           | 568884               | 98.08%             | 1376475                    | 341366.00              | 664                                | 99.60%              |
| F07           | 457130               | 98.37%             | 2437345                    | 825353.00              | 653                                | 99.42%              |
| F08           | 406176               | 98.06%             | 1806841                    | 579443.00              | 532                                | 99.57%              |
| F09           | 494357               | 98.31%             | 1950712                    | 543877.00              | 584                                | 99.61%              |
| F10           | 506946               | 98.58%             | 1799819                    | 612603.00              | 637                                | 99.38%              |
| F11           | 431524               | 98.35%             | 1873856                    | 562824.00              | 581                                | 99.53%              |
| F12           | 424937               | 98.21%             | 3494973                    | 1498192.00             | 508                                | 98.96%              |
| F13           | 392900               | 98.11%             | 4084221                    | 978321.00              | 405                                | 98.99%              |

**Table 3. Noninvasive Prenatal Diagnosis of DMD Families**

| Family | Fetal DNA fraction | Fetal gender | Phased SNPs | Hap0 | Hap1 | Fetal Haplotype | NIPD     | CVS      |
|--------|--------------------|--------------|-------------|------|------|-----------------|----------|----------|
| F01    | 15.39%             | female       | 790         | 606  | 184  | Hap0            | carrier  | carrier  |
| F02    | 6.22%              | male         | 877         | 877  | 0    | Hap0            | affected | affected |
| F03    | 10.13%             | female       | 774         | 0    | 774  | Hap1            | normal   | normal   |
| F04    | 8.60%              | female       | 435         | 0    | 435  | Hap1            | normal   | normal   |
| F05    | 8.60%              | male         | 781         | 0    | 781  | Hap1            | normal   | normal   |
| F06    | 12.32%             | female       | 262         | 0    | 262  | Hap1            | normal   | normal   |
| F07    | 9.14%              | male         | 727         | 718  | 9    | Hap0            | affected | affected |
| F08    | 18.54%             | female       | 750         | 750  | 0    | Hap0            | carrier  | carrier  |
| F09    | 7.45%              | female       | 860         | 0    | 860  | Hap1            | normal   | normal   |
| F10    | 7.68%              | female       | 384         | 0    | 384  | Hap1            | normal   | normal   |
| F11    | 9.67%              | female       | 425         | 0    | 425  | Hap1            | normal   | normal   |
| F12    | 8.21%              | female       | 964         | 0    | 964  | Hap1            | normal   | normal   |
| F13    | 16.97%             | male         | 1087        | 0    | 1087 | Hap1            | normal   | normal   |

Notes: Hap0, fetal-inherited maternal mutant haplotype; Hap1, fetal-inherited maternal wild-type

haplotype; CVS, Chorionic Villi Sampling ;
